# Supplementary material for: Enhancement of Glucose Uptake in Mouse Skeletal Muscle Cells and Adipocytes by P2Y6 Receptor Agonists
Source: PubMed Central journal article supplement (PMC4280206; doi:10.1371/journal.pone.0116203), 2014-12-30
Supplement: pone.0116203.s001.pdf [file pone.0116203.s001.pdf]

**Figure S1. Glucose uptake efficacy of P2Y<sub>6</sub>R agonist MRS2957 at different doses in C2C12 myotubes and 3T3-L1 adipocytes**

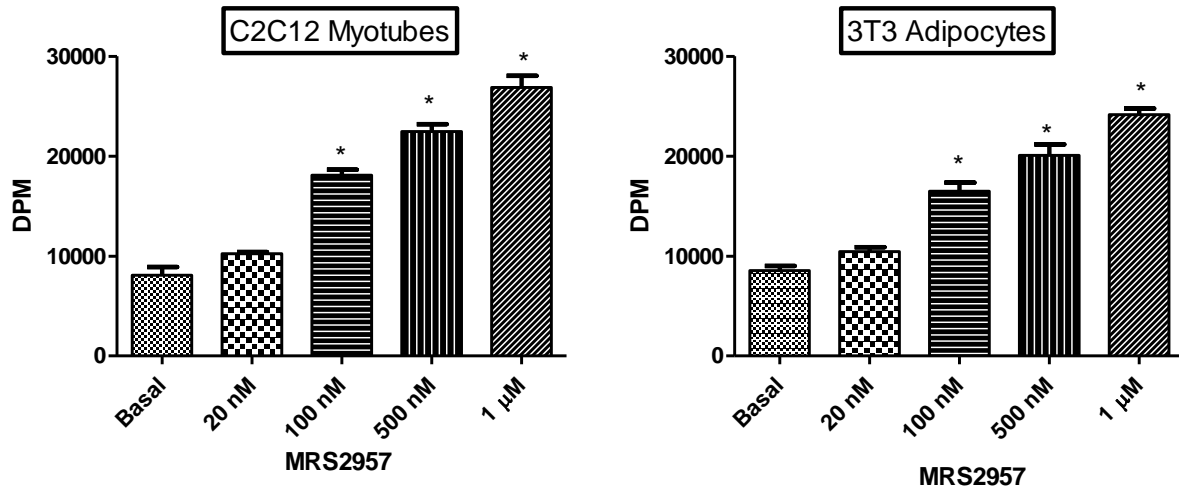

*Glucose uptake efficacy of P2Y<sub>6</sub>R agonist MRS2957 at different doses in C2C12 myotubes and 3T3-L1 adipocytes.* C2C12 myotubes and 3T3-L1 adipocytes were treated with increasing dosage of MRS2957 and the glucose uptake was evaluated as described in the Materials and Methods section.
