# Supplementary material for: Enhancement of Glucose Uptake in Mouse Skeletal Muscle Cells and Adipocytes by P2Y6 Receptor Agonists
Source: PubMed Central journal article supplement (PMC4280206; doi:10.1371/journal.pone.0116203), 2014-12-30
Supplement: pone.0116203.s002.pdf [file pone.0116203.s002.pdf]

**Figure S2. Glucose uptake efficacy of MRS2957+Insulin in C2C12 myotubes and 3T3-L1 adipocytes**

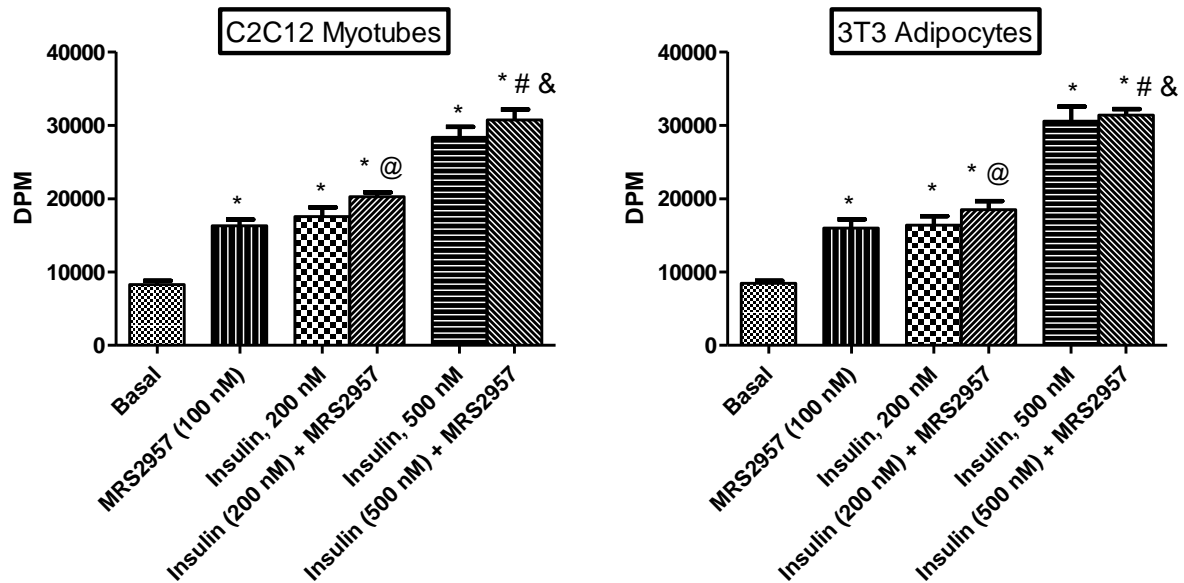

***Glucose uptake efficacy of MRS2957+Insulin in C2C12 myotubes and 3T3-L1 adipocytes.***

*C2C12* myotubes and 3T3-L1 adipocytes were co-treated with MRS2957 (100 nM) and insulin at either 200 nM or 500 nM concentration. \* $P < 0.05$ , when compared to Basal; @, not significant when compared to Insulin, 200 nM; #, not significant when compared to Insulin, 500 nM; &,  $P < 0.05$ , when compared to MRS2957 (100 nM).
